# Supplementary material for: A Methodology to Create Mother-Baby Dyads Using Data From the Pediatric Health Information System
Source: Oxford University Press journal article supplement (doi:10.1542/hpeds.2022-006565), 2022-09-28
Supplement: hpeds.2022-006565supplementarydata.pdf [file hpeds.2022-006565supplementarydata.pdf]

## Supplemental Information

**SUPPLEMENTAL TABLE 2** ICD-10 Procedure Codes to Identify Mode of Delivery for Maternal Discharges

| ICD-10 Procedure Codes | Code Description                                                                          |
|------------------------|-------------------------------------------------------------------------------------------|
| Vaginal delivery       |                                                                                           |
| 10E0XZZ                | Delivery of Products of Conception, External Approach                                     |
| 10D07Z3                | Extraction of Products of Conception, Low Forceps, Via Natural or Artificial Opening      |
| 10D07Z4                | Extraction of Products of Conception, Low Forceps, Via Natural or Artificial Opening      |
| 10D07Z5                | Extraction of Products of Conception, High Forceps, Via Natural or Artificial Opening     |
| 10D07Z6                | Extraction of Products of Conception, Vacuum, Via Natural or Artificial Opening           |
| 10D07Z7                | Extraction of Products of Conception, Internal Version, Via Natural or Artificial Opening |
| 10D07Z8                | Extraction of Products of Conception, Other, Via Natural or Artificial Opening            |
| Cesarean delivery      |                                                                                           |
| 10D00Z0                | Extraction of Products of Conception, High, Open Approach                                 |
| 10D00Z1                | Extraction of Products of Conception, Low, Open Approach                                  |
| 10D00Z2                | Extraction of Products of Conception, Extraperitoneal, Open Approach                      |

**SUPPLEMENTAL TABLE 3** Data Included by Hospital and Year

| Hospital | Discharge Year |      |      |      |      |
|----------|----------------|------|------|------|------|
|          | 2016           | 2017 | 2018 | 2019 | 2020 |
| A        | a              | a    | a    | a    | a    |
| B        |                | a    | a    | a    | a    |
| C        | a              | a    | a    | a    | a    |
| D        | a              | a    | a    | a    | a    |
| E        |                | a    | a    | a    | a    |
| F        |                | a    | a    |      |      |

<sup>a</sup>Data included.
